# Supplementary material for: Increases of Phosphorylated Tau (Ser202/Thr205) in the Olfactory Regions Are Associated with Impaired EEG and Olfactory Behavior in Traumatic Brain Injury Mice
Source: MDPI journal article supplement (doi:10.3390/biomedicines10040865), 2022-04-07
Supplement: s1 [file s1]

## Supplemental Information

**Figure S1.** Activity levels are not significantly changed between control and TBI mice in Y-maze test. **a** Total distance and velocity measured during Y maze experiments. TBI mouse models exhibit a slight increase in physical activity compared to controls without reaching significance (distance,  $p = 0.3058$ ; velocity,  $p = 0.3913$ ). **b** Total frequency and duration in the starting arm measured during Y maze experiments. No significant difference was detected between controls vs. TBI mice (frequency,  $p = 0.9595$ ; duration,  $p = 0.4475$ ) [control, N=5; TBI, N=6].

**Table S1.** Table of animals and time line for experiments

| Experiment               | Mouse line (Gender) | Age of animal (at 1 <sup>st</sup> TBI) | Number of animals         | Timeline of experiment |
|--------------------------|---------------------|----------------------------------------|---------------------------|------------------------|
| Pathology                | WT (male)           | 3 months                               | Control; N=5<br>TBI; N=5  | 3days after TBI        |
| Y-maze                   | WT (male)           | 3 months                               | Control; N=5<br>TBI; N=6  | 3days after TBI        |
| Buried food seeking test | WT (male)           | 3 months                               | Control; N=6<br>TBI; N=6  | 3days after TBI        |
| Olfactory Oddball test   | Thy1 (male)         | 3 months                               | Control; N=4<br>TBI; N=10 | 3-5days after TBI      |

**Video S1.** Searching activity for home bedding is altered between control and TBI mice in Y-maze test.
